# Supplementary material for: The Effect of Supplementation with Betaine and Zinc on In Vitro Large Intestinal Fermentation in Iberian Pigs under Heat Stress
Source: MDPI journal article supplement (doi:10.3390/ani13061102), 2023-03-20
Supplement: s1 [file s1]

**Table S1.** Chemical composition of the control diet (g/kg as fed).

| <b>Ingredients</b>                 |      |
|------------------------------------|------|
| Barley grain                       | 700  |
| Corn                               | 144  |
| Soybean meal                       | 127  |
| Calcium phosphate                  | 9.3  |
| Calcium carbonate                  | 6.2  |
| Sodium chloride                    | 3.0  |
| L-Lysine (50%)                     | 5.0  |
| L-Threonine (50%)                  | 2.1  |
| Methionine hydroxy-analog (75%)    | 0.7  |
| Vitamins and minerals <sup>1</sup> | 3.0  |
| <b>Chemical analysis</b>           |      |
| Dry matter                         | 899  |
| Ash                                | 48.6 |
| Ether extract                      | 17.5 |
| Crude protein                      | 146  |
| Gross energy (MJ/kg)               | 16.6 |
| aNDFom <sup>2</sup>                | 141  |
| ADFom <sup>3</sup>                 | 44.5 |
| Lignin(sa) <sup>4</sup>            | 2.1  |

<sup>1</sup> Provided (per kg of diet): 2000 UI retinol as retinyl acetate, 800 UI cholecalciferol, 40 UI dL- $\alpha$ -tocopheryl acetate, 1.5 mg menadione, 2 mg thiamine, 3 mg riboflavin, 50  $\mu$ g cyanocobalamin, 15  $\mu$ g folic acid, 22.5 mg nicotinic acid, 15 mg d-pantothenic acid, 60 mg MnO, 80 mg FeCO<sub>3</sub>, 80 mg ZnO, 750  $\mu$ g KI, 10 mg CuSO<sub>4</sub>  $\times$  5H<sub>2</sub>O, 50  $\mu$ g Na<sub>2</sub>SeO<sub>3</sub>, 250 mg sepiolite, 1.5 mg butylhydroxyanisole (BHA), and 7.5 mg butylhydroxytoluene (BHT). <sup>2</sup> aNDFom, neutral detergent fiber inclusive of ash residual. <sup>3</sup> ADFom, acid detergent fiber exclusive of residual ash.

<sup>4</sup> Lignin(sa), lignin determined by solubilization of cellulose with sulfuric acid.

**Table S2.** Target bacterial groups quantified, primer sequences, amplicon sizes, type strains used as standards, and conditions of culture of the type strains.

| Target                    | F primer                                 | R primer                                        | Amplicon size | Type strain                    | Culture conditions    | Final concentration |
|---------------------------|------------------------------------------|-------------------------------------------------|---------------|--------------------------------|-----------------------|---------------------|
| Total bacteria            | CGG<br>TGA<br>ATA<br>CGT<br>TCC<br>CGG   | TAC<br>GGC<br>TAC<br>CTT<br>GTT<br>ACG<br>ACT T | 142           | Escherichia coli<br>ATCC 11775 | 24 h,<br>anaerobiosis | 1011 cfu/mL         |
| <i>Enterobacteriaceae</i> | ATG<br>GCT<br>GTC<br>GTC<br>AGC<br>TCG T | CTA<br>CTT<br>CTT<br>TTG<br>CAA<br>CCC<br>ACT C | 385           | Escherichia coli<br>ATCC 11775 | 24 h,<br>anaerobiosis | 1011 cfu/mL         |

|                                    |                                              |                                                    |         |                                        |                       |             |
|------------------------------------|----------------------------------------------|----------------------------------------------------|---------|----------------------------------------|-----------------------|-------------|
| <i>Lactobacillus</i>               | AGC<br>AGT<br>AGG<br>GAA<br>TCT<br>TCC A     | CAC<br>CGC<br>TAC<br>ACA<br>TGG<br>AG              | 337-341 | Lactobacillus<br>plantarum<br>CECT 748 | 24 h,<br>anaerobiosis | 1010 cfu/mL |
| <i>Bifidobacterium</i>             | CGC<br>GTC<br>YGG<br>TGT<br>GAA<br>AG        | GGT<br>GTT<br>CTT<br>CCC<br>GAT<br>ATC<br>TAC<br>A | 127     | Bifidobacterium<br>bifidum CECT<br>870 | 48 h,<br>anaerobiosis | 1010 cfu/mL |
| <i>Bacteroides</i>                 | GAG<br>AGG<br>AAG<br>GTC<br>CCC<br>CAC       | CGC<br>TAC<br>TTG<br>GCT<br>GGT<br>TCA G           | 106     | Bacteroides<br>coprosuis DSM<br>18011  | 48 h,<br>anaerobiosis | 1010 cfu/mL |
| <i>Clostridium cluster<br/>IV</i>  | ACA<br>GGT<br>GGT<br>GCA<br>TGG<br>TTG<br>TC | AGA<br>GTG<br>CTC<br>TTG<br>CGT<br>AG              | 101     | Clostridium<br>leptum DSM<br>753       | 48 h,<br>anaerobiosis | 109 cfu/mL  |
| <i>Clostridium cluster<br/>XIV</i> | AAA<br>TGA<br>CGG<br>TAC<br>CTG<br>ACT<br>AA | CTA<br>CGC<br>WCC<br>CTT<br>TAC<br>AC              | 102     | Blautia<br>coccoides DSM<br>935        | 48 h,<br>anaerobiosis | 109 cfu/mL  |
